# Supplementary material
Source: publisher figshare collection journal article supplement (https://tandf.figshare.com/articles/dataset/_/8792612)
Supplement: Supplementary file 1 [file 1]

## 1 Supplemental Results

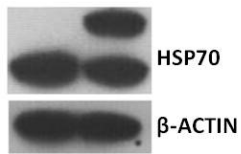

2 GFP HSP70-GFP

3 Fig S1. Western blot analysis of protein expression for endogenous Hsp70 in  
4 granulosa cells transfected with a full-length Hsp70-GFP fusion construct or mock vector.  
5 Transfected granulosa cells lysates were subjected to SDS-PAGE and immunoblotting using the  
6 anti-Hsp70 antibody.  $\beta$ -actin was used as fractionation control.

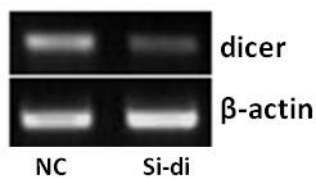

7

8 Fig S2. Transcript levels of *DICER* by RT-PCR after transfection of granulosa cells with control  
9 siRNAs (NC) and *DICER* siRNA (Si-di).



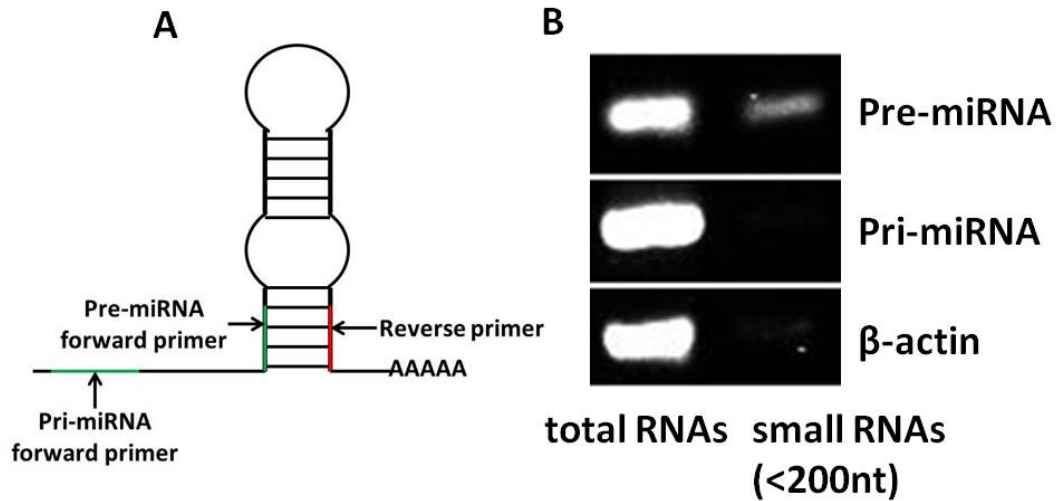

FigS4. (A) Schematic illustration of PCR primers of pri-ssc-ca-1 and pre-ssc-ca-1. The PCR product length of pri-miRNA is 400 bp, and product length of pre-miRNA is 67 bp. (B) RT-PCR analysis showed the primary (pri) and precursor (pre) forms of ssc-ca-1 existed in granulosa cells. The  $\beta$ -actin gene was used as control. The small RNAs (<200 nt) were isolated using mirVana™ miRNA Isolation Kit (Ambion), and the total RNAs were isolated using Trizol reagent (Invitrogen). The RNAs were reverse-transcribed with oligo(dT).

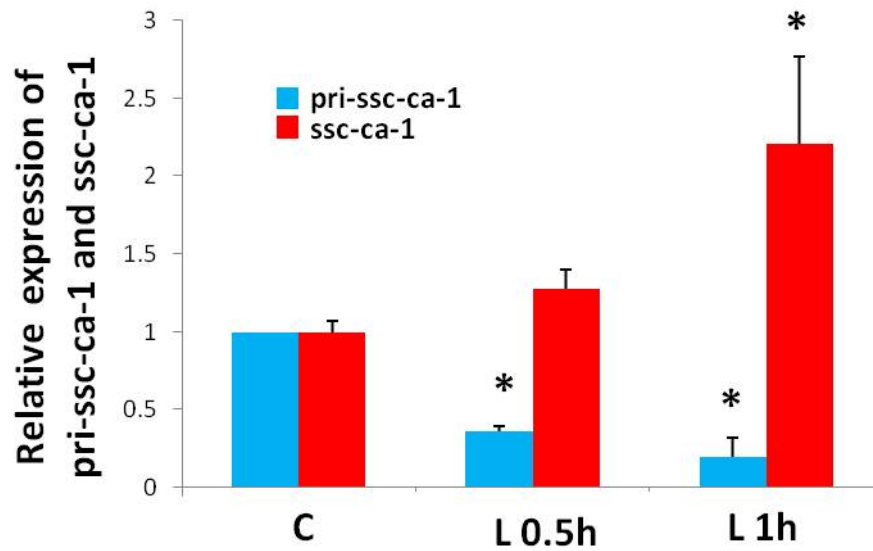

FigS5. ssc-ca-1 and its pri-miRNA expressions in granulosa cells after exposure to lethal heat stress (LHS) for the indicated times.

1

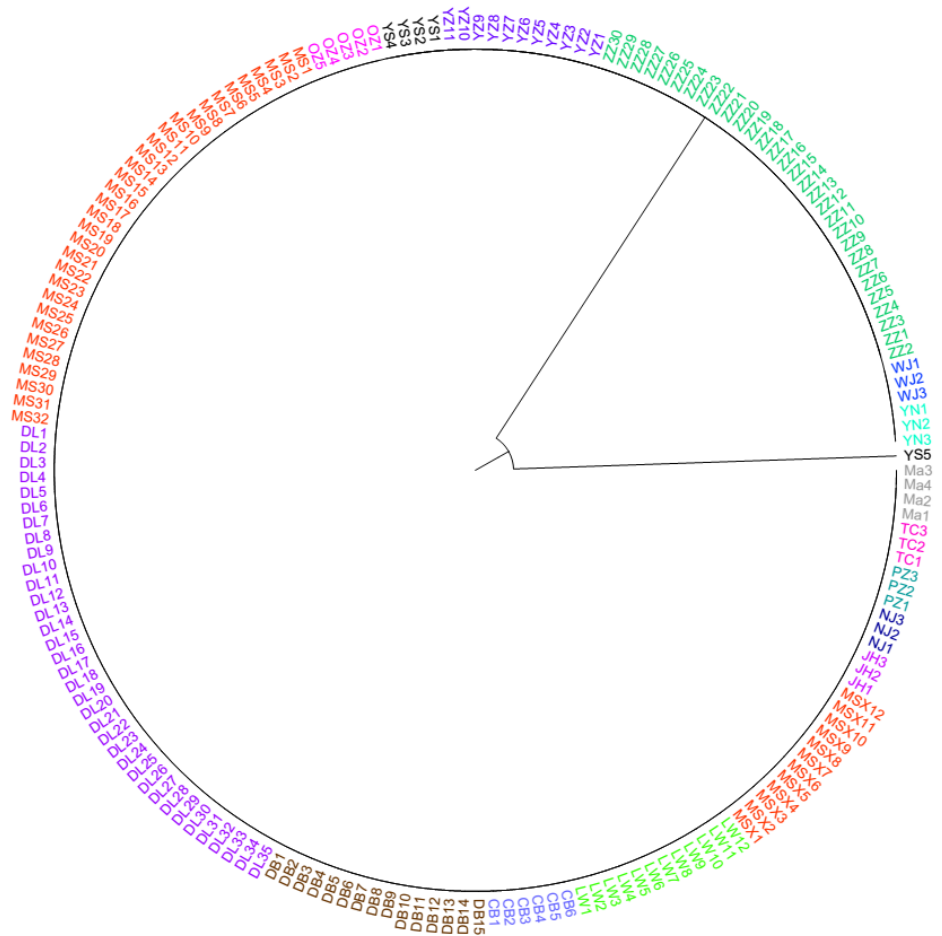

2

3 Fig S6. Neighbor-joining tree of *ssc-ca-1* gene from wild and domestic pigs based on our data and  
 4 publicly available whole-genome sequences of pigs. Different colors represent clusters of  
 5 subpopulations. ZZ 1-30, Tibetan pigs; YZ 1-11, Asian wild boars; YS 1-5, primitive boars (YS1,  
 6 Sumatran; YS2, *Sus\_barbatus*; YS3, *Phacochoerus\_africanus*; YS4, *Sus\_celebensis*; YS5,  
 7 *Sus\_verrucosus*); OZ 1-5, European wild boars; MS 1-32, Meishan pigs; DL 1-35, Duroc pigs; DB  
 8 1-15, Large White pigs; CB 1-6, landrace pigs; LW 1-12, Laiwu pigs; MSX 1-12, Meishan pigs; JH  
 9 1-3, Jinhua pigs; NJ 1-3, Neijiang pigs; PZ 1-3, Pengzhou pigs; TC 1-3, Tongchen pigs; Ma1-4,  
 10 Mangalica pigs; YN 1-3, Yanan pigs; WJ 1-3, Wujin pigs.

11

12

13

14

1

2

3 Fig S7. Neighbor-joining tree of precursor gene of *ssc-ca-1* from wild and domestic pigs based on  
 4 our data and publicly available whole-genome sequences of pigs. Different colors represent  
 5 clusters of subpopulations. ZZ 1-30, Tibetan pigs; YZ 1-11, Asian wild boars; YS 1-5, primitive  
 6 boars (YS1, Sumatran; YS2, *Sus\_barbatus*; YS3, *Phacochoerus\_africanus*; YS4, *Sus\_celebensis*; YS5,  
 7 *Sus\_verrucosus*); OZ 1-5, European wild boars; MS 1-32, Meishan pigs; DL 1-35, Duroc pigs; DB  
 8 1-15, Large White pigs; CB 1-6, landrace pigs; LW 1-12, Laiwu pigs; MSX 1-12, Meishan pigs; JH  
 9 1-3, Jinhua pigs; NJ 1-3, Neijiang pigs; PZ 1-3, Pengzhou pigs; TC 1-3, Tongchen pigs; Ma1-4,  
 10 Mangalica pigs; YN 1-3, Yanan pigs; WJ 1-3, Wujin pigs.

11

12

13

14

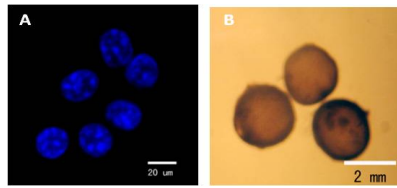

Fig S8. Morphology of isolated follicles from porcine ovaries. (A) Hoechst 33342 staining of isolated porcine primordial follicles, with granulosa cells located at the periphery. Bar = 20 μm. (B) Morphology of isolated growing follicles. Bar = 2 mm.

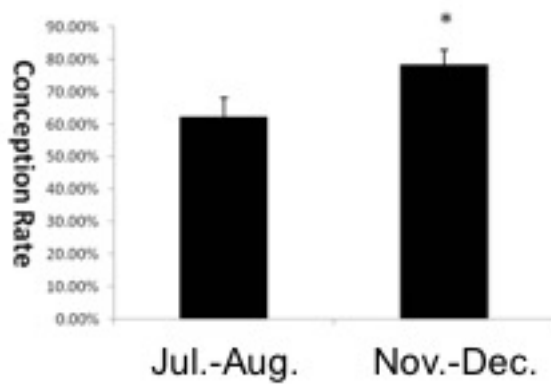

Fig S9. Effect of seasonal variations on conceptions rates in sows.

Jul.-Aug.: The duration time from July to August in 2013, 2014 and 2015. Nov.-Dec.: The duration time from November to December in 2013, 2014 and 2015. The experiment was conducted in the experimental dairy herd of the Agricultural Research Organization in Beijing, China. N > 50 in every group. \*p<0.05.
