# Supplementary material
Source: publisher figshare collection journal article supplement (https://tandf.figshare.com/articles/dataset/_/8792612)
Supplement: Supplementary file 2 [file 3]

Archive with 3 entries (3 files):
- STAR METHODS.docx
- Supplemental Tables.docx
- Supplementary figures.pdf
