# Supplementary material
Source: publisher figshare collection journal article supplement (https://tandf.figshare.com/articles/dataset/_/8792612)
Supplement: Supplementary file 2 [file 3 › STAR METHODS.docx]

**STAR METHODS**

Unless otherwise specified, all chemicals were purchased from Sigma-Aldrich Chemicals (St. Louis, MO, USA).

**Heat stress treatment**

Heat stress of granulosa cells cultured *in vitro*: Culture plates containing cells were wrapped tightly with parafilm and immersed in a water bath set to 42°C (sub-lethal heat stress condition) or 47°C (lethal heat stress condition) for 2 h. Cells were then continuously cultured at 37oC for different periods of time after heat stress.

Heat stress of cultured porcine ovaries *in vitro*: ovaries during the follicular phase of the estrous cycle were collected from pre-pubertal and white crossbred gilts at a local slaughterhouse and transferred to the laboratory. Each ovary was split into two parts with a scalpel. One half of the ovarian tissue was heated in PBS at 40°C or 41.5°C for 2 h, and the other half was stored at 37oC as the control.

*In vivo* functional studies of sows: All experimental protocols were approved by the Committee for the Care and Use of Experimental Animals at China Agriculture University. The experiment was conducted in the experimental dairy herd of the Agricultural Research Organization in Beijing, China. The study involved 13 cyclic white crossbred sows (200±10 kg) that had been subjected to thermal stress during the summer (July to August 2014), when the local temperature values recorded for the period were a maximum of 29.5oC, a minimum of 23oC, and a daily average of 27.1oC. At the end of August, 6 pigs were electrically stunned using a head-only electric stun tong apparatus and subsequently exsanguinated. Granulosa cells in follicles from the surface of the ovary (from growing follicles) were collected. The remaining pigs were reared during the autumn (September to October 2014), when the local temperature values recorded for the period were a maximum of 24.5oC, a minimum of 9oC, and a daily average of 17.6oC (source, http://www.nmc.gov.cn). At the end of October, the remaining pigs were exsanguinated and granulosa cells collected as above.

*In vivo* functional studies of boars: All experimental protocols were approved by the Committee for the Care and Use of Experimental Animals at China Agriculture University. The experiment was conducted in the experimental dairy herd of the Agricultural Research Organization in Beijing, China. 12 fourteen-day-old white crossbred boars were randomly divided to two group (heat stress and control). The scrota of piglets were exposed to a single heat shock treatment. The piglets were fixed in homemade cloth instruments, and the lower half of the torso was submerged for 2 hours in a water bath set at 45°C at noon each day. Piglets were returned to cages post heat exposure each day. After four days, 6 piglets were castrated to collect testes. Control piglets were treated in water bath at 35°C for 2 hours each day.

**Small RNA deep sequencing**

Total RNA was extracted using Trizol (Life Technologies, Carlsbad, CA, USA) according to the manufacturer’s protocol. Sequencing of RNA samples was conducted as follows: for each treatment, equal quantities (10 µg) of total RNA isolated from cells in three individual culture plates were pooled. Approximately 30 µg of total RNA representing each treatment was used for library preparation and sequencing. Two biological replicates were performed for small RNA deep sequencing. Small RNA libraries were constructed using the ‘‘Small RNA v1.5 Sample Prep’’ kit from Illumina (San Diego, CA, USA). Unique 4-bp barcode sequences were added to the 5′ adaptors so that the libraries could be multiplexed and the reads sorted by sample. The barcoded libraries from one biological replicate were pooled in equimolar concentrations and sequenced on a single lane on a Genome Analyzer IIx for 41 cycles. Files were processed with Illumina’s CASAVA pipeline (version 1.5). Sequencing was carried out at Berrygenomics Corp. (Beijing, China). The small RNA high-throughput sequencing data reported in this paper has been deposited in the NCBI Sequence Read Archive (accession no. PRJNA543953) [https://www.ncbi.nlm.nih.gov/sra/PRJNA543953]

**Sequence analysis**

Individual sequence reads with base quality scores were produced by Solexa (Illumina, San Diego, CA, USA). Low-quality reads were removed from the raw reads. After trimming the 3′ adaptor sequence and removing the 5′ adaptor contaminants, all identical sequences of sizes ranging from 18–30 nt were counted and eliminated from the initial data set. The resulting unique sequences with associated read counts were referred to as sequence tags.

The miRanalyzer standalone version was used for further analysis. Some sequence data were retrieved from known websites. Pig chromosome data were downloaded from the Sscrofa10.2 database at NCBI. The ncRNA data were downloaded from the Rfam 10.1 database. Pig mRNAs were retrieved from the NCBI Nucleotide database. Known miRNAs/miRNA hairpins were obtained from the miRBase 18.0 database. The EdgeR package was used to identify differentially expressed miRNAs among treatments with a p-value of <0.05 as the cutoff.

**Quantitative real-time RT-PCR of mRNA and miRNA**

mRNA transcripts were measured using a standard SYBR Green real-time PCR assay. RNA was isolated using Trizol reagent, and 2 µg of total RNA was reverse-transcribed using the RevertAidTM First Strand cDNA Synthesis Kit (originally purchased from Thermo Scientific, Pittsburgh, PA). Real-time PCR was performed on cDNA in an 2X Master SYBR Green mix (Tiangen, Beijing, China) with gene-specific primers (supplemental Table S1). β-actin was used as a housekeeping gene. Amplicons were analyzed using the 2-ΔΔCt method, and data are represented as the mean of three independent experiments ± S.E.

To quantify miRNA expression, RNA samples were isolated with Trizol reagent and subjected to reverse transcription reactions (RevertAidTM First Strand cDNA Synthesis Kit, Thermo Scientific). cDNA was amplified in an SYBR Green Real-Time PCR Master Mix (Toyobo, Japan) for expression of ssc-ca-1 miRNA. 5S RNA was used as an internal control. Primers were designed based on the sequences of interest (supplemental Table S2).

**Granulosa cell culture and serum starvation treatment**

Porcine pre-pubertal ovaries were collected at a local slaughterhouse. Antral follicles (4–6 mm diameter) were aspirated by hand using a 19-gauge needle attached to a 10-cc syringe. Granulosa cells were separated from the follicular fluid by centrifugation at 300 × g for 5 min. The cells were washed twice and then cultured in humidified air with 5% CO2 at 37°C. The basic culture medium was Dulbecco’s modified Eagle medium (DMEM, Life Technologies, Carlsbad, CA, USA) supplemented with 10% fetal bovine serum (FBS, Life Technologies, Carlsbad, CA, USA), HEPES (25 mM), penicillin (50 U/mL), and streptomycin (50 µg/mL). Subculture of cells was performed at 80% confluence. Passage 2 cells at approximately 80% confluence were serum-starved in DMEM supplemented with 0.5% FBS for 48 h.

**Isolation of primordial and growing follicles**

Isolation of porcine primordial follicles was performed as described with some modifications. Briefly, after the medulla was removed, the ovarian cortex was cut into small pieces (2–3 mm) and placed in Dulbecco’s PBS containing 0.025% collagenase type I. The tissue was incubated at 37°C for 1.5 h with gentle shaking. The follicular digest was successively filtered through 400-, 200-, 100-, 37-, and 12-μm nylon mesh. After washing the nylon mesh with PBS, primordial follicles were isolated from the upper face of the 12-μm mesh. Follicles were flushed from the inverted 12-μm nylon mesh with PBS and the flushing fluid was collected and centrifuged at 500 × g at 4 °C for 5 min. The follicle pellet was re-suspended in PBS.

Growing (antral) follicles (~2 mm diameter) were mechanically isolated from fresh ovarian tissue in PBS. Briefly, follicles were isolated under a dissecting microscope at 37°C by gently teasing them out with two 26-gauge needles attached to 1-ml syringes. Only healthy follicles with the following characteristics were selected: 1) vascularized theca interna and clear amber follicular fluid without debris; and 2) a visible round oocyte within the follicle.

**Isolation of Spermatogonial stem cells and Sertoli cells**

Single-cell suspensions were prepared using a sequential enzymatic digestion protocol as described previously with minor changes. Briefly, the tunica albuginea and visible connective tissue were removed from testes. The exposed seminiferous tubules were dissociated with collagenase IV (2 mg/ml) in Dulbecco modified Eagle medium (DMEM) at 37°C for 20–40 min with occasional agitation, followed by the addition of hyaluronidase (1 mg/ml) for 15–20 min. The tissue was then rinsed twice in Dulbecco phosphate-buffered saline without Ca2+ and further digested with 0.25% (w/v) trypsin and 1 mM ethylenediaminetetra-acetic acid at 37°C for 5–10 min. DNase I (7 mg/ml) in DMEM was added as needed. FBS (Life Technologies) was added to stop enzymatic digestion. The resulting cell suspension was filtered through 100-, 70-, and 40-μm cell strainers sequentially (BD Biosciences, San Jose, CA). The single cells were then collected by centrifugation at 500 × g for 5 min at 16°C, and the pellet was resuspended in DMEM with 10% FBS and cultured at 37 °C and 5% CO2 for 0.5 h. The adherent cells were collected as sertoli cells. The cell suspensions were collected to enrich porcine spermatogonial stem cells by fluorescence-activated cell sorting (FACS).

For FACS, porcine testis cell suspension was stained on ice in Dulbecco’s phosphate-buffered saline (D-PBS) containing 10% FBS for 20 min with fluorescent-conjugated antibodies (FITC Mouse Anti-Human CD90, 561969; BD Biosciences). The unbound primary antibody was washed away twice with D-PBS, the cells were filtered through a 35μm strainer (BD Bioscience) and 0.5μg/ml propidium iodide (BD Bioscience) was added to distinguish between live and dead cells. FACS analysis was done using FACSvantage SE (BD Bioscience) and the positive staining was identified by comparison to appropriate isotype control in order to correct for non-specific binding. Sorting gates were established based on level of marker expression as well as exclusion of dead cells stained with propidium iodide and exclusion of cells exhibiting non-specific binding or autofluorescence.

**Caspase-3 activity assay**

Caspase-3 activity was determined using the Caspase-3 Activity Assay Kit (Applygen, Beijing, China). After treatment, granulosa cells were pelleted by centrifugation (1000 × g for 10 min). The cell pellet was lysed in 60 µL lysis buffer on ice for 20 min, and the lysate was centrifuged at 13,000 g for 15 min. The supernatant was collected and the protein concentration was assayed using the Super-Bradford Protein Assay Kit (CWbiotech, Beijing, China). Triplicate aliquots of supernatant containing 50 µg protein were transferred to a 96-well plate and incubated with 100 µL of buffer containing caspase substrates at 37°C in the dark for 2 h. Absorbance at 405 nm was measured using a microplate reader (Bio-Rad, Hercules, CA).

**Dual staining with Annexin V-FITC and PI**

Apoptotic granulosa cells were quantified by measuring externalized phosphatidylserine (PS) assessed by Annexin V-FITC and by propidium iodide (PI) uptake. After serum starvation with or without heat stress, cells were stained with an Annexin V-FITC apoptosis detection kit (Keygen, China). Briefly, harvested cells were rinsed once with PBS and then resuspended in 250 µL of 1X binding buffer supplemented with 2 µL Annexin V-FITC and 2 µL PI. After incubation at room temperature in the dark for 15 min, the cells were analyzed using FACS Calibur (BD Biosciences) and CellQuest software (BD Biosciences).

**Immunoblot analysis**

Cells were lysed with a Tissue Protein Extraction Kit (CWbiotech). The protein concentration of the supernatant was determined using a BCA Protein Assay Kit (CWbiotech), with bovine serum albumin (BSA) as the standard. Equal amounts of proteins were separated by SDS-PAGE and transferred to a nitrocellulose membrane (BioTraceNT, Pall Corporation, Ann Arbor, MI). Nonspecific binding to the membrane was blocked with 5% nonfat milk in TBST [10 mm Tris (pH 7.5), 150 mm NaCl, and 0.1% Tween 20] at room temperature for 1 h. Membranes were then incubated with primary antibodies at 4°C overnight, washed in TBST, and incubated with horseradish peroxidase (HRP)-conjugated secondary antibodies at room temperature for 1 h. Antibodies against BIMEL (C34C5) and phos-ERK (Thr202/Tyr204) were purchased from Cell Signaling Technology (Danvers, MA, USA). Anti-β-actin antibody (P30002) was obtained from Abmart Biotechnology (Shanghai, China). Antibodies against Dicer (SC-136981), Bcl-2 (SC-7382), and phos-JNK (G-7) were purchased from Santa Cruz Biotechnology (Santa Cruz, CA, USA). Anti-aromatase antibody (A7981) was obtained from Sigma-Aldrich (St. Louis, MO, USA). Anti-HSP70 antibody (SPA-810) was purchased from Stressgen Biotechnologies Corporation (Victoria, BC, Canada). HRP-conjugated anti-rabbit and anti-mouse antibodies were obtained from Zhongshan Belling Biotechnology (Zhongshan, China). The protein bands were visualized using an eECL Western Blot Kit (CWbiotech) and X-OMAT BT film (Kodak, Rochester, NY, USA), according to the manufacturer’s instructions.

**Immunocytochemistry**

Briefly, cells were fixed to glass slides with 4% formaldehyde-PBS (pH 7.4) at room temperature for 1 h. After rinsing three times with PBS, the cells were permeabilized with 0.25% Triton X-100-PBS at room temperature for 20 min and endogenous peroxidase was blocked using 3% H2O2 in methanol. Antigen retrieval was performed with citrate buffer (pH 6.0) treatment in a microwave oven for 20 min, followed by cooling to room temperature. Nonspecific binding was blocked using 10% normal goat serum (Boster Biological Technology, Wuhan, China) at room temperature for 1 h, after which the slides were incubated with the anti-HSP70 antibody (1:200) overnight at 4°C. After rinsing three times with PBS, the slides were incubated with HRP-conjugated anti-mouse antibody (1:500) at room temperature for 1 h. Antibody binding was visualized by incubating the cells with a DAB kit (Boster).

**Plasmids**

The HSP70 expression construct was generated by subcloning PCR-amplified full-length porcine *Hsp70* cDNA (NM_213766.1) into pEGFP-N1 (Clontech, Mountain View, CA) (supplemental Table S3). The reading frame of *Hsp70* cDNA was connected with enhanced GFP to obtain a recombinant pEGFP-N1-HSP70 plasmid. The plasmid was propagated using DH5α (Tiangen, China) as the host strain, purified with an EndoFree Plasmid Maxi Kit (Qiagen, Dusseldorf, Germany), and sequenced to confirm the open reading frame.

**miRNA mimic and anti-miRNA inhibitor transfections**

Transient transfection of cells with miRNA mimics: Granulosa cells (passage 2) were seeded and cultured overnight, then transfected with 20 nM of the css-ca-1,2,3, or 4 miRNA mimics, or with negative control RNA (GenePharma, Shanghai, China) using Lipofectamine 2000 (Invitrogen) per the manufacturer’s instructions. The miRNA mimics were small double-stranded RNA oligonucleotides. Two days after transfection, the cells were subjected to sub-lethal heat stress (42°C, 2 h) and then cultured at 37°C for 3 h. The sequences of synthetic miRNA mimics used in this study were: ssc-ca-1, 5′-GUGGCUGUGGCUCGACCCCUGGC-3′ and 5′-CAGGGGUCGAGCCACAGCCACUU-3′; ssc-ca-2, 5′-UCCAUAUGCCGCAGGUGCGGCC-3′ and 5′-CCGCACCUGCGGCAUAUGGAUU-3′; ssc-ca-3, 5′-AGUUGAUUAGGGUUUUAGCU-3′ and 5′-CUAAAACCCUAAUCAACUUU-3′; ssc-ca-4, 5′-GCUUCUACAGUGGCUGUGGCU-3′ and 5′-CCACAGCCACUGUAGAAGCUU-3′; negative control, 5′-UUCUCCGAACGUGUCACGUTT-3′ and 5′-ACGUGACACGUUCGGAGAATT-3′.

Anti-miRNA inhibitor transfection: Cells were transfected with 20 nM 2’–O-methylated single-stranded ssc-ca-1 antisense oligonucleotides (ASO), 40 nM ssc-ca-3 ASO, or negative control oligonucleotides (GenePharma) using Lipofectamine 2000. Two days after transfection, the cells were subjected to lethal heat stress (47°C, 2 h), and then cultured at 37°C for 3 h. The sequences of anti-miRNAs used in this study were: anti-ssc-ca-1, 5′-GCCAGGGGUCGAGCCACAGCCAC-3′; anti-ssc-ca-3, 5′-AGCUAAAACCCUAAUCAACU-3′; ASO negative control, 5′-CAGUACUUUUGUGUAGUACAA-3′.

**Dual luciferase reporter assay**

Granulosa cells in 3-cm plates were co-transfected with 1 µg of the *HSP70* 5′ UTR, CDS, or 3′ UTR luciferase reporters (The pmirGLO Dual-Luciferase miRNA Target Expression Vector, Promega, Madison, WI) with 20 nM of either the ssc-ca-1 mimic, ssc-ca-3 mimic, or negative control duplexes using the Lipofectamine 2000 reagent (Life Technologies). After transfection for 48 h, the cells were harvested by adding 300 μL of a passive lysis buffer. Renilla and firefly luciferase activities were measured with the Dual Luciferase Assay System (Promega) in a GloMaxR 20/20 luminometer (Promega); the firefly luciferase signal was normalized to the Renilla luciferase signal.

**siRNAs and transfection**

siRNA molecules were synthesized by Invitrogen. The sequences of the siRNAs used in this study were: Dicer: 5′-GAAUCAGCCUCGCAACAAAdTdT-3′, 5′-UUUGUUGCGAGGCUGAUUCdTdT-3′; and negative control: 5′-UUCUCCGAACGUGUCACGUTT-3′, 5′-ACGUGACACGUUCGGAGAATT-3′. Granulosa cells were plated in 6-cm dishes at 60% confluence. siRNAs were transfected at 18 nM concentration with Lipofectamine 2000 reagent (Invitrogen) in media containing DMEM medium without serum or antibiotics. To confirm the effect of siRNA on target gene knockdown, total RNA was collected and complementary DNA synthesis performed at 48 h after transfection. Primer sequences for RT-PCR are shown in supplemental Table S1. For experiments, cells were subjected to lethal heat stress (47°C, 2 h) on 2 days after transfection and then cultured at 37°C for 24 h prior to total protein collection for immunoblotting.

**Statistical analysis**

Values reported in all analyses were expressed as the mean±SEM. A one-way ANOVA was performed to compare the following: caspase-3 activity, luciferase activity, RNAs and Hsp70 protein expressions, the rates of FDA-positive oocytes. Differences among treatment groups were determined with Duncan’s multiple-range test. All statistical analyses were done with the Statistical Analysis System (SAS Institute, Cary, NC, USA) and p<0.05 was considered significant. Unless otherwise specified, all experiments were repeated at least three times.

**SUPPLEMENTAL INFORMATION TITLES AND LEGENDS**

Figure S1. Western blot analysis of protein expression for endogenous and exogenous Hsp70 in granulosa cells transfected with a full-length Hsp70-GFP fusion construct or mock vector.

Figure S2. Transcript levels of *DICER* by RT-PCR after transfection of granulosa cells with control siRNAs (NC) and *DICER* siRNA (Si-di).

Figure S3. Expressed pattern of known microRNAs detected by small RNAs deep sequencing in porcine granulosa cells from non-treated (C1, C2) and treated by sublethal (SL1, SL2) as well as lethal (L1, L2) heat stress.

Figure S4. Schematic illustration of PCR primers of pri-ssc-ca-1 and pre-ssc-ca-1.

Figure S5. ssc-ca-1 and its pri-microRNA expressions in granulosa cells after exposure to lethal heat stress for the indicated times.

Figure S6. Neighbor-joining tree of ssc-ca-1 gene from wild and domestic pigs based on our data and publicly available whole-genome sequences of pigs.

Figure S7. Neighbor-joining tree of precursor gene of ssc-ca-1 from wild and domestic pigs based on our data and publicly available whole-genome sequences of pigs.

Figure S8. Morphology of isolated follicles from porcine ovaries.

Figure S9. Effect of seasonal variations on conceptions rates in sows.

Table S1. Genbank access, sequence, and product length for each pair of primers designed.

Table S2. MicroRNA Gene Specific Primer Sets.

Table S3. Specific Primer Sets for Vector Construct
