# Supplementary material
Source: publisher figshare collection journal article supplement (https://tandf.figshare.com/articles/dataset/_/8792612)
Supplement: Supplementary file 2 [file 3 › Supplemental Tables.docx]

**Supplemental Tables**

Table S1. Genbank access, sequence, and product length for each pair of primers designed

| Gene name | Primer 1 (5′-3′) | Primer 2 (5′-3′) | Product length (bp) | GenBank |
| --- | --- | --- | --- | --- |
| HSP70 | TTCGACGTGTCCATCCTGACG | TCACCGCCCGCTTGTTCTGG | 169 | NM_213766.1 |
| HSP27 | CAAGGACGGCGTGGTGGAGA | CAGGGGACAGGGAGGAGGAGA | 140 | AY789513.1 |
| HSP90 | CAAGACCGGACCCTCACGAT | AGAAGCCGACACCGAACTGG | 163 | U94395.1 |
| Dicer1 | GTCAGACTGTCGTGCCGTATT | CTTTCAAACTGCTGTCGCTCG | 282 | NM_001197194.1 |
| β-actin | GGTCATCACCATCGGCAAC | TGTCCACGTCGCACTTCAT | 128 | AJ312193.1 |

Table S2. MicroRNA Gene Specific Primer Sets

| **Description** | **Sequence** |
| --- | --- |
| ssc-ca-1 RT | 5′ GTCGTATCCAGTGCAGGGTCCGAGGTATTCGCACTGGATACGACGCCAGGGG 3′ |
| ssc-ca-1 PCR | Forward: 5′ CTTCTTGTGGCTGTGGCTC 3′  Reverse: 5′ CCAGTGCAGGGTCCGAGGTAT 3′ |
| 5s PCR | Forward: 5′ GCCCGATCTCGTCTGATCT 3′  Reverse: 5′ AGCCTACAGCACCCGGTATT 3′ |

Table S3. Specific Primer Sets for Vector Construct

| Description | Sequence |
| --- | --- |
| HSP70-GFP fusion construct (pEGFP-N1, Clontech) | Forward: 5′ CTCTCGAGGTGAGCGCAGCCTTGGCA 3′  Reverse: 5′ TCGGTACCGCATCCACCTCCTCGATGGT 3′ |
| HSP70 3′ UTR construct  (psiCHECK™-2 Vector, Promega) | Forward: 5′ AACTCGAGACCATCGAGGAGGTGGATTA 3′  Reverse: 5′ TTGCGGCCGCTTCCTTAACTTTTCGTGTGTTTAC 3′ |
| HSP70 CDS construct  (psiCHECK™-2 Vector, Promega) | Forward: 5′ AACTCGAGATGGCGAAGAGCGTGGCCAT 3′  Reverse: 5′ AAGCGGCCGCATCCACCTCCTCGATGGTGG 3′ |
| HSP70 5′ UTR construct  (psiCHECK™-2 Vector, Promega) | Forward: 5′ AACTCGAGAACAGGTGCCGTGCAAACAGC 3′  Reverse: 5′ TTGCGGCCGCGGCGATGATCTCCACCTTGC 3′ |
| pre-ssc-ca-1 construct  (pCDH-CMV-MCS-EF1-copGFP(CD511B-1), System Biosciences) | Forward: 5′ AAGAATTCTATTTTCATAAATCATAC 3′  Reverse: 5′ TTGGATCCAGGAGATAGTCATGTAAT 3′ |
